# Supplementary material
Source: MDPI journal article supplement (https://www.mdpi.com/2072-4292/8/2/149)
Supplement: s1 [file s1]

Supplementary Materials: Moving Towards Dynamic Ocean Management: How Well Do Modeled Ocean Products Predict Species Distributions? *Remote Sensing* 2016, *8*, 149.

Elizabeth A. Becker, Karin A. Forney, Paul C. Fiedler, Jay Barlow, Susan J. Chivers, Christopher A. Edwards, Andrew M. Moore, and Jessica V. Redfern

**Table S1**. Summary of the final encounter rate (delphinids) or single response (Dall's porpoise and large whales) GAMs built with either measured data or ROMS output using only those predictor variables common to both datasets. Terms are represented as smoothing spline functions with associated effective degrees of freedom to indicate the level of smoothing (e.g., s(3.24)) or linear terms (“linear”). A tensor product smooth is represented as “te” with the bivariate terms and associated effective degrees of freedom (e.g., te(LON,LAT, 7.97)). Variable abbreviations are as follows: SST = sea surface temperature, MLD = mixed layer depth, SAL = sea surface salinity, sdSST = standard deviation of SST, DEPTH = bathymetric depth, SLOPE = bathymetric slope, ASPECT = slope direction, d200 = distance to the 200-m isobath, LON = longitude, and LAT = latitude. P-values are indicated with *** (< 0.001), ** (< 0.01), and * (< 0.05). All models were corrected for effort with an offset for the effective area searched, and both fin whale models also included a year covariate that captured their increase in abundance during the 1991–2009 survey years (see text for details).

| **Species** | **Model type** | **Generalized Additive Model (GAM)** | | | | | | | |
| --- | --- | --- | --- | --- | --- | --- | --- | --- | --- |
|  |  | **SST** | **MLD** | **SAL** | **sdSST** | **DEPTH** | **SLOPE** | **ASPECT** | **Bivariate** |
| Striped dolphin | Measured |  |  | s(3.08) * |  | linear*** |  |  |  |
|  | ROMS | s(2.64)* |  |  |  | s(3.53)*** |  |  |  |
| Short-beaked common dolphin | Measured | s(5.62)*** | linear*** | s(3.48)*** | linear* | s(5.87)*** |  | s(3.80)*** |  |
| ROMS | s(7.11)*** |  | s(5.41)*** |  | s(6.75)*** |  | s(3.55)*** |  |
| Long-beaked common dolphin | Measured | linear* |  |  |  |  |  | s(1.39)* | te(LON,LAT, 7.98)*** |
| ROMS | linear* |  |  |  |  |  | s(1.37)* | te(LON,LAT, 7.97)*** |
| Common bottlenose dolphin | Measured | s(3.91)** | s(2.85)* |  |  |  |  |  | te(LAT,d200, 12.46)*** |
| ROMS | s(2.57)* | s(3.31)* |  |  |  |  |  | te(LAT,d200, 12.54)*** |
| Risso’s dolphin | Measured | s(4.46)* |  |  |  |  |  |  | te(LAT,d200, 17.49)*** |
| ROMS | s(6.70)** |  |  |  |  |  | s(1.59)* | te(LAT,d200, 17.63)*** |
| Pacific white-sided dolphin | Measured | linear*** | s(5.42)*** | s(3.47)*** |  | s(3.83)*** |  |  |  |
| ROMS | linear*** |  | s(1.65)* |  | s(4.24)*** |  |  |  |
| Northern right whale dolphin | Measured | s(4.27)*** | linear*** |  |  | s(5.22)*** |  |  |  |
| ROMS | s(3.66)*** |  |  | linear* | s(5.36)*** |  |  |  |
| Dall’s porpoise | Measured | s(6.71)*** | linear*** | s(4.24)** | s(5.57)*** | s(6.31)*** | linear** |  |  |
| ROMS | s(3.56)*** | linear*** | s(6.16)*** | s(3.30)** | s(7.36)*** | linear*** |  |  |
| Fin whale | Measured | s(4.96)*** | s(4.83)*** | s(3.19)*** | s(2.59)*** | s(6.35)*** |  | s(1.80)* |  |
| ROMS | s(5.02)*** |  | s(6.61)*** |  | s(6.53)** |  | s(1.84)* |  |
| Blue whale | Measured | s(5.61)*** |  |  | s(4.97)** | linear*** |  |  | te(LAT,MLD, 11.95)*** |
| ROMS | s(5.16)*** |  |  |  | s(4.48)*** |  |  | te(LAT,MLD, 14.17)*** |
| Humpback whale | Measured | s(5.33)*** |  | s(6.90)*** |  | s(2.24)*** | linear* | s(5.97)** |  |
| ROMS | s(6.53)*** |  | s(4.81)*** | s(3.78)** | s(2.17)*** | linear** | s(6.38)*** |  |

**Table S2**. Percentage of explained deviance (Expl. Dev.) and root mean squared error (RMSE) for the final encounter rate (delphinids) or single response (Dall's porpoise and large whales) GAMs built with either measured data or ROMS output for those variables common to both datasets.. Percentage of explained deviance is also shown for the delphinid group size models (same spatial model used for both data types). The number of sightings (No. sites) reflects the total available for model development. Ratios of line-transect over model-predicted density estimates (Ratio) are for the total study area as calculated for each segment and summed.

| Species | No. Sites |  | **Data Type** | | **Group Size Model** |
| --- | --- | --- | --- | --- | --- |
|  | **Measured** | **ROMS** |
| Striped dolphin | 103 | Expl.Dev. | 2.34 | 3.24 | 19.7 |
|  |  | RMSE | 0.086 | 0.086 |  |
|  |  | Ratio | 1.100 | 1.070 |  |
| Short-beaked common dolphin | 718 | Expl.Dev. | 3.99 | 1.67 | 8.4 |
|  |  | RMSE | 0.221 | 0.220 |  |
|  |  | Ratio | 1.020 | 1.060 |  |
| Long-beaked common dolphin | 128 | Expl.Dev. | 50.8 | 50.5 | 10.0 |
|  |  | RMSE | 0.089 | 0.088 |  |
|  |  | Ratio | 1.026 | 1.029 |  |
| Common bottlenose dolphin | 61 | Expl.Dev. | 31.9 | 33.2 | 15.3 |
|  |  | RMSE | 0.066 | 0.064 |  |
|  |  | Ratio | 0.992 | 0.992 |  |
| Risso’s dolphin | 172 | Expl.Dev. | 13.3 | 14.5 | 4.2 |
|  |  | RMSE | 0.110 | 0.109 |  |
|  |  | Ratio | 0.976 | 0.977 |  |
| Pacific white-sided dolphin | 137 | Expl.Dev. | 18.8 | 15.5 | 7.2 |
|  |  | RMSE | 0.098 | 0.099 |  |
|  |  | Ratio | 0.916 | 0.824 |  |
| Northern right whale dolphin | 108 | Expl.Dev. | 14.3 | 13.9 | 8.7 |
|  |  | RMSE | 0.085 | 0.085 |  |
|  |  | Ratio | 1.000 | 0.973 |  |
| Dall’s porpoise | 527 | Expl.Dev. | 34.9 | 34.1 |  |
|  |  | RMSE | 1.052 | 1.050 | NA |
|  |  | Ratio | 0.938 | 0.931 |  |
| Fin whale | 362 | Expl.Dev. | 9.9 | 3.1 |  |
|  |  | RMSE | 0.513 | 0.512 | NA |
|  |  | Ratio | 0.874 | 0.865 |  |
| Blue whale | 261 | Expl.Dev. | 14.3 | 15.2 |  |
|  |  | RMSE | 0.258 | 0.258 | NA |
|  |  | Ratio | 0.948 | 0.947 |  |
| Humpback whale | 275 | Expl.Dev. | 45.8 | 43.9 |  |
|  |  | RMSE | 0.330 | 0.349 | NA |
|  |  | Ratio | 0.97 | 0.959 |  |


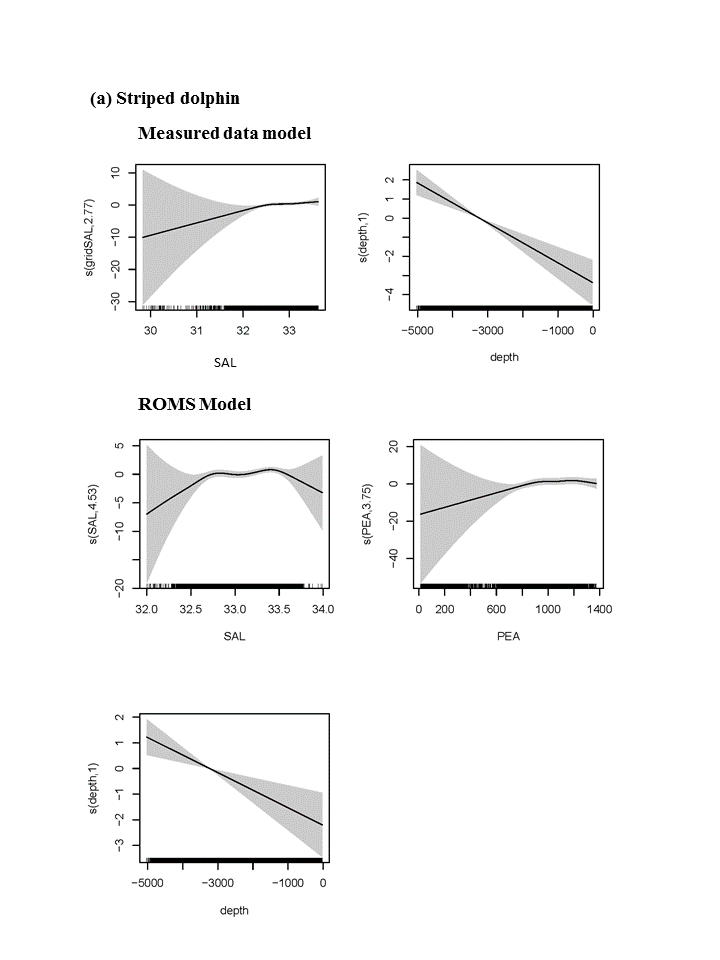


**Figure S1**. *Cont*.


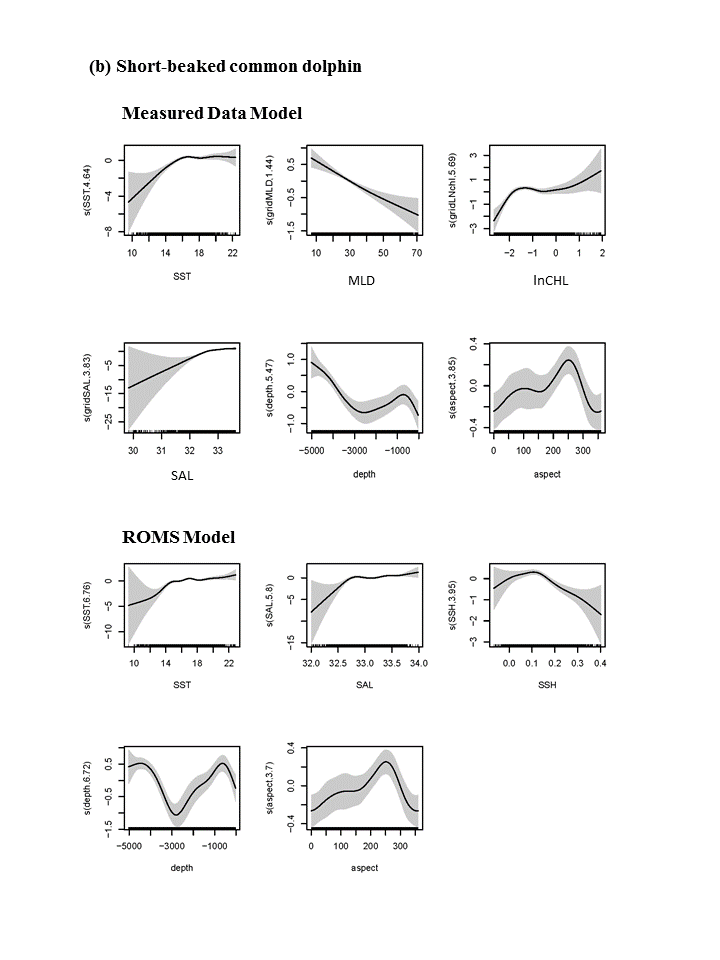


**Figure S1**. *Cont*.


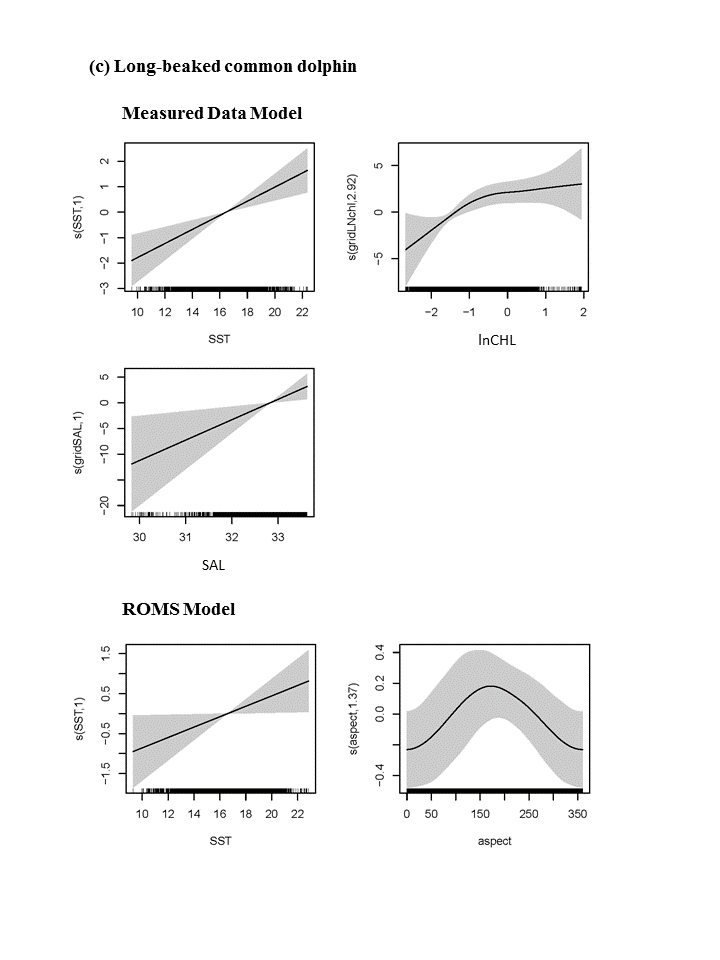


**Figure S1**. *Cont*.


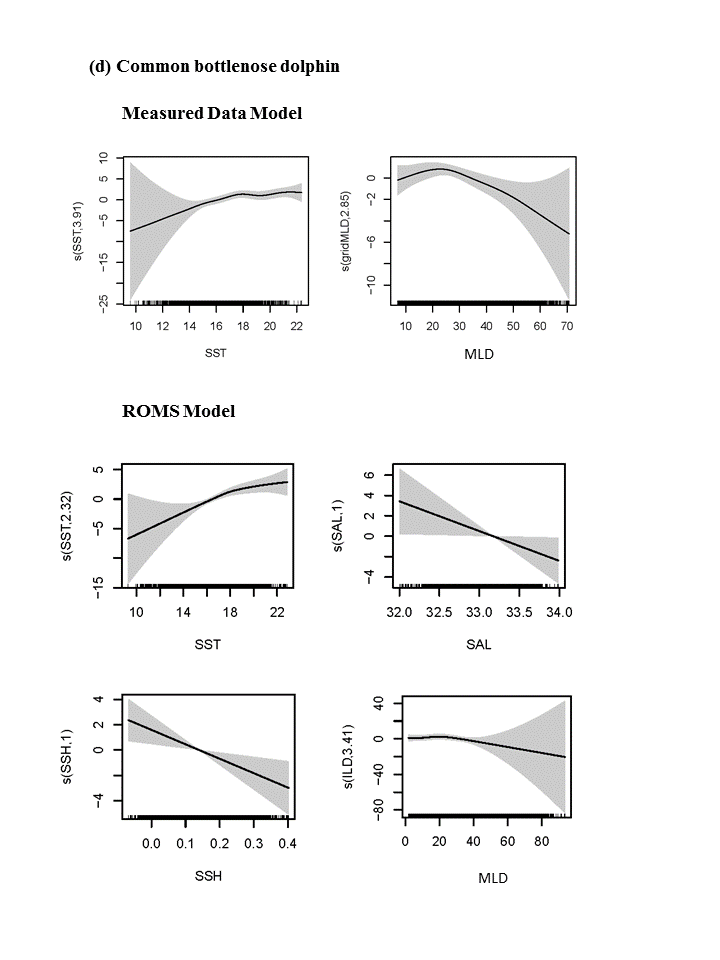


**Figure S1**. *Cont*.


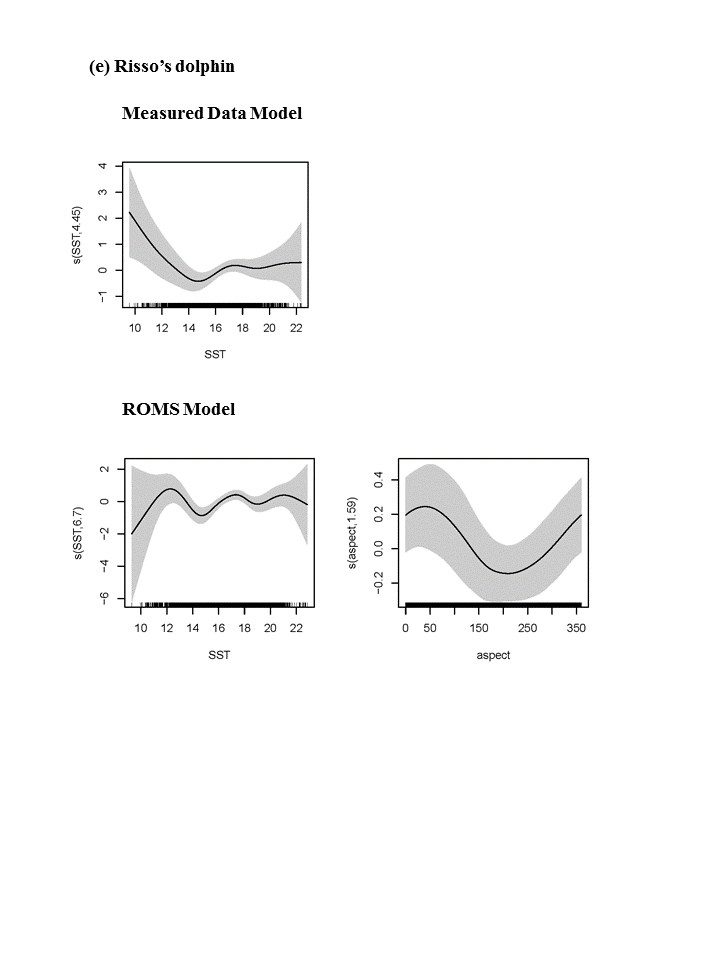


**Figure S1**. *Cont*.


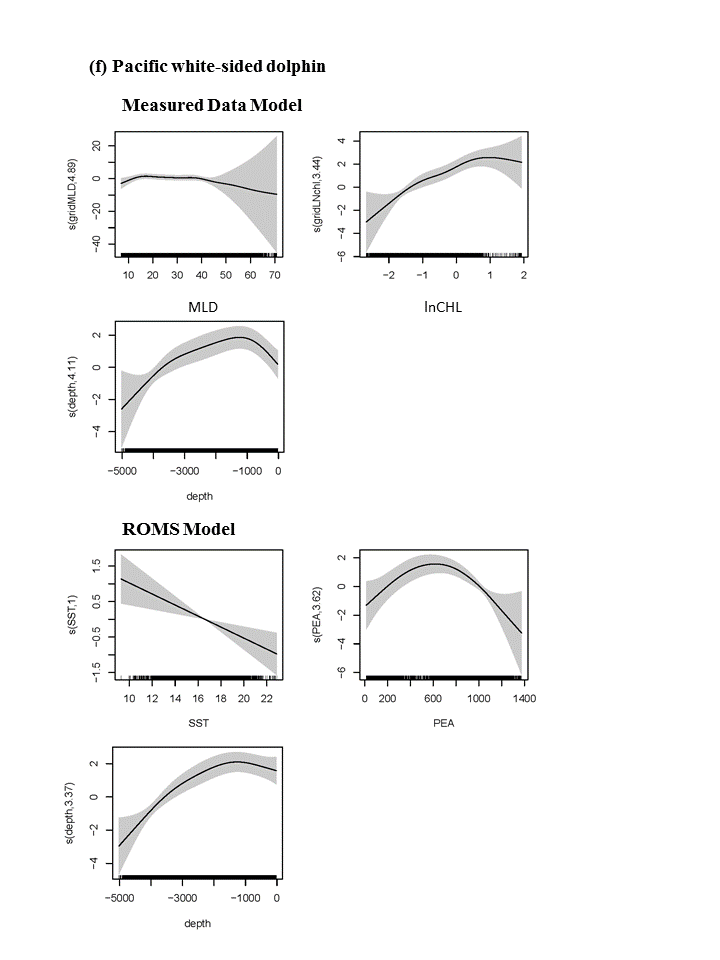


**Figure S1**. *Cont*.


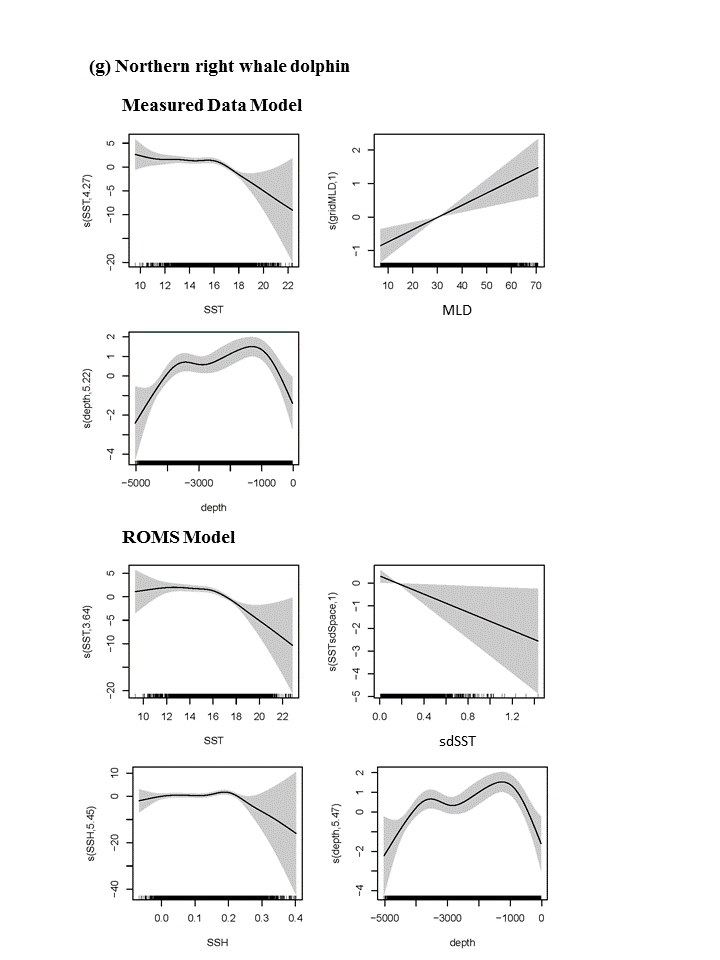


**Figure S1**. *Cont*.


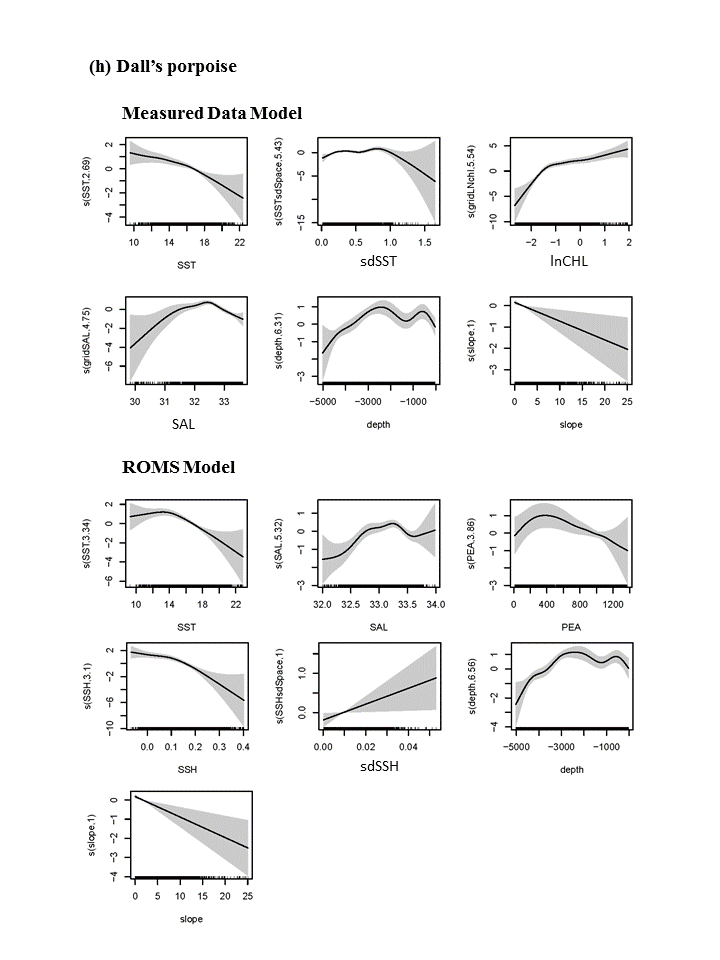


**Figure S1**. *Cont*.


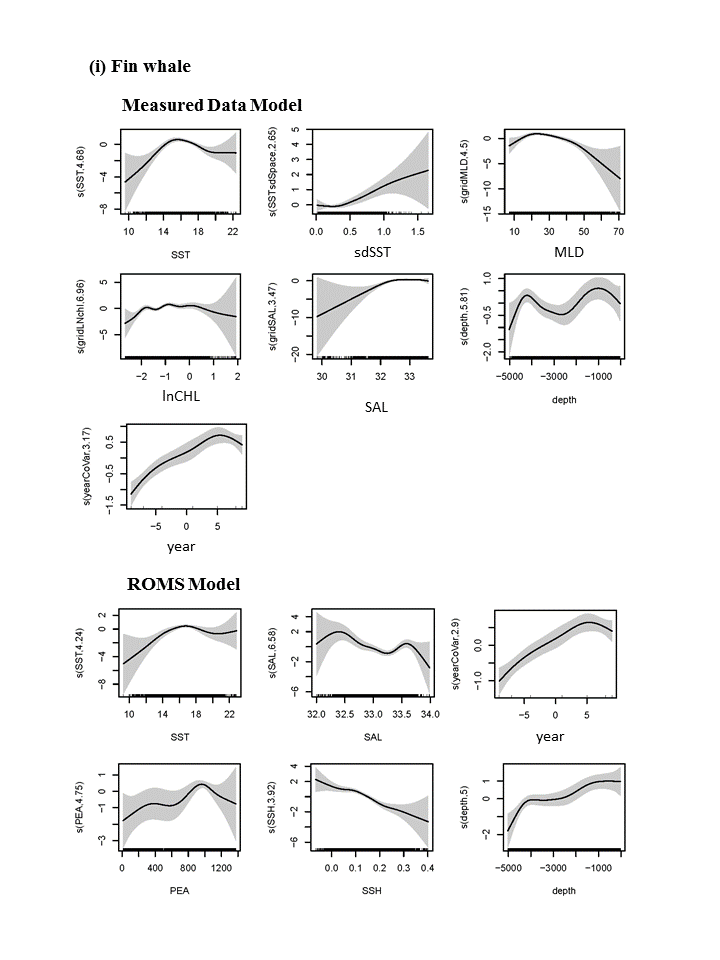


**Figure S1**. *Cont*.


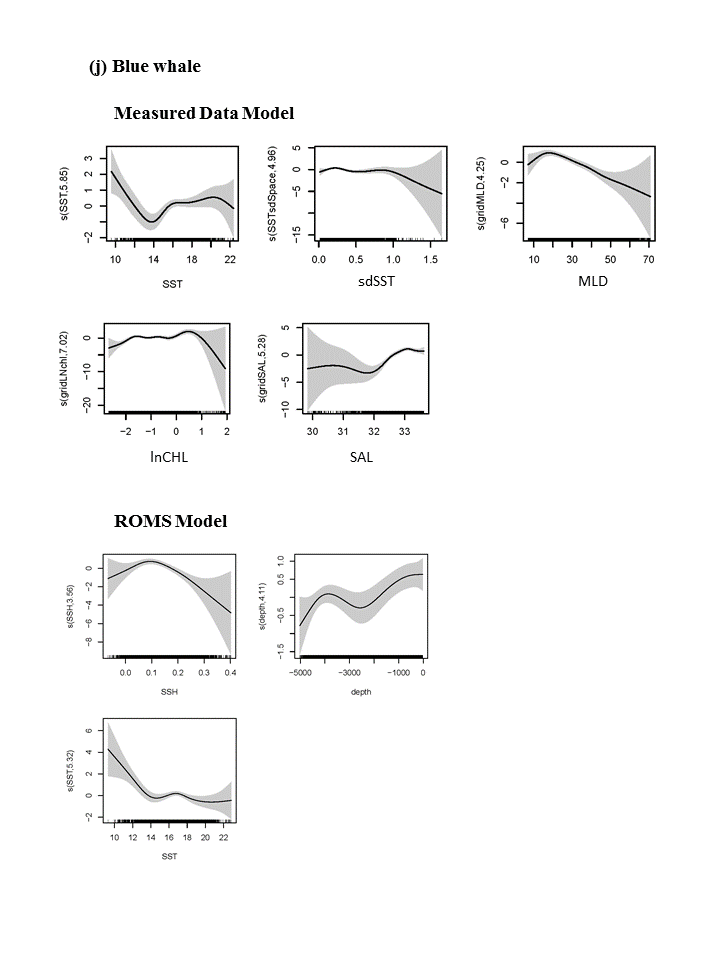


**Figure S1**. *Cont*.


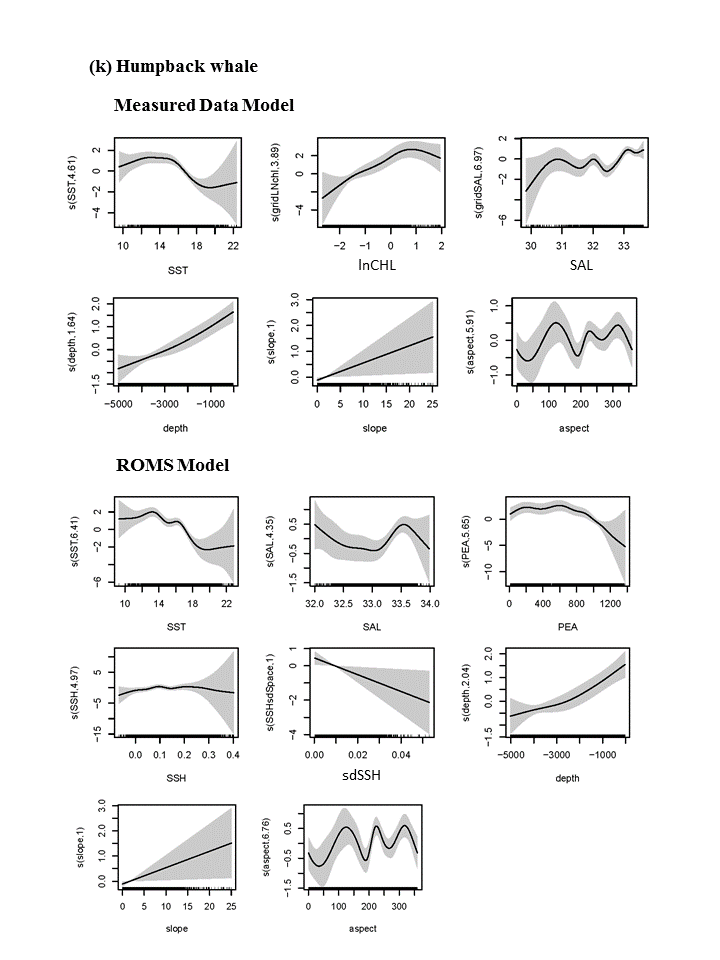


**Figure S1.** Final encounter rate (delphinids) or single response (Dall's porpoise and large whales) functions for models built with either measured data (top panels) or ROMS output (bottom panels) for (**a**) striped dolphin, (**b**) short-beaked common dolphin, (**c**) long-beaked common dolphin,
(**d**) common bottlenose dolphin, (**e**) Risso’s dolphin, (**f**) Pacific white-sided dolphin, (**g**) northern right whale dolphin, (**h**) Dall’s porpoise, (**i**) fin whale, (**j**) blue whale, and (**k**) humpback whale. Models were constructed with both linear terms and smoothing splines. Degrees of freedom for nonlinear fits are in the parentheses on the y-axis. Potential predictor variables included: SST = sea surface temperature, MLD = mixed layer depth, lnCHL=log chlorophyll, SAL = sea surface salinity,
PEA = potential energy anomaly, SSH = sea surface height, sdSSH = standard deviation of SSH,
sdSST = standard deviation of SST, depth = bathymetric depth, slope = bathymetric slope, and aspect = slope direction. The y-axes represent the term’s (linear or spline) function. Zero on the y-axes corresponds to no effect of the predictor variable on the estimated response variable. Scaling of y-axis varies among predictor variables to emphasize model fit. The shading reflects 2x standard error bands (*i.e.*, 95% confidence interval); tick marks (‘rug plot’) above the X axis show data values.

© 2016 by the authors; licensee MDPI, Basel, Switzerland. This article is an open access article distributed under the terms and conditions of the Creative Commons by Attribution (CC-BY) license (http://creativecommons.org/licenses/by/4.0/).
